# Supplementary material for: lncRNA GCAT1 is involved in premature ovarian insufficiency by regulating p27 translation in GCs via competitive binding to PTBP1
Source: PubMed Central journal article supplement — Mol Ther Nucleic Acids. 2020 Nov 4;23:132–41. doi: 10.1016/j.omtn.2020.10.041 (PMC7733005; doi:10.1016/j.omtn.2020.10.041), 2020-11-04
Supplement: mmc1.pdf [file mmc1.pdf]

OMTN, Volume 23

## Supplemental Information

**lncRNA *GCA71* is involved in premature ovarian  
insufficiency by regulating p27 translation in  
GCs via competitive binding to PTBP1**

**Duan Li, Xiaoyan Wang, Yujie Dang, Xinyue Zhang, Shidou Zhao, Gang Lu, Wai-Yee Chan, Peter C.K. Leung, and Yingying Qin**

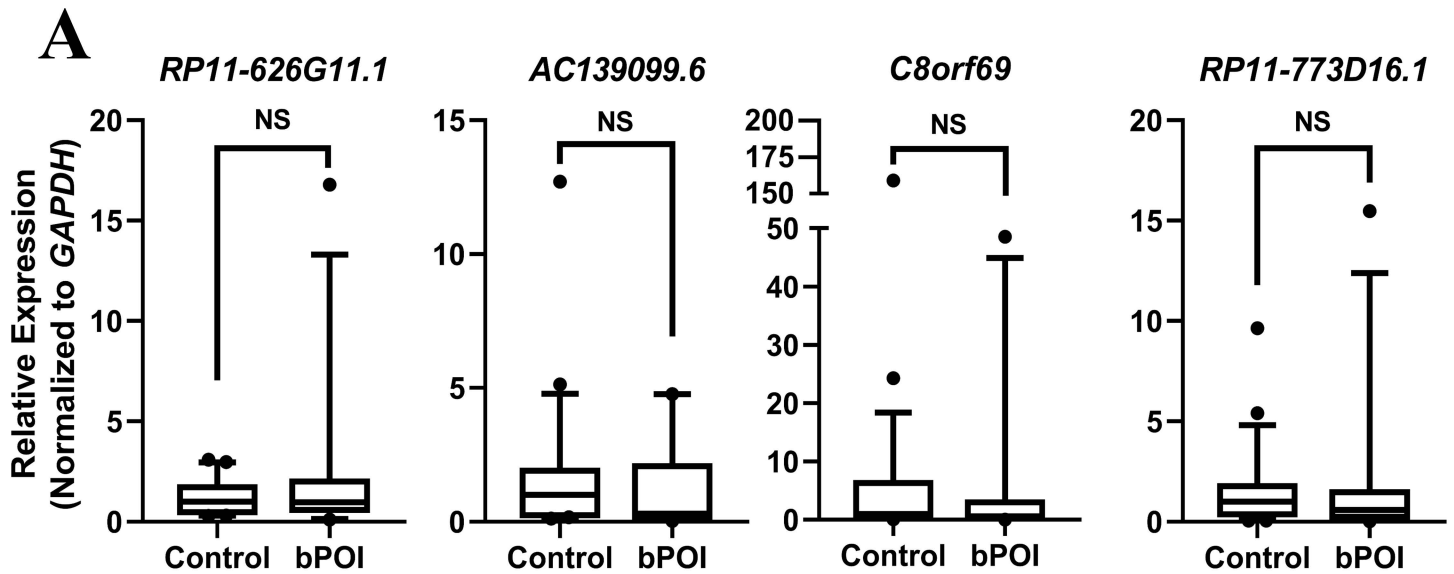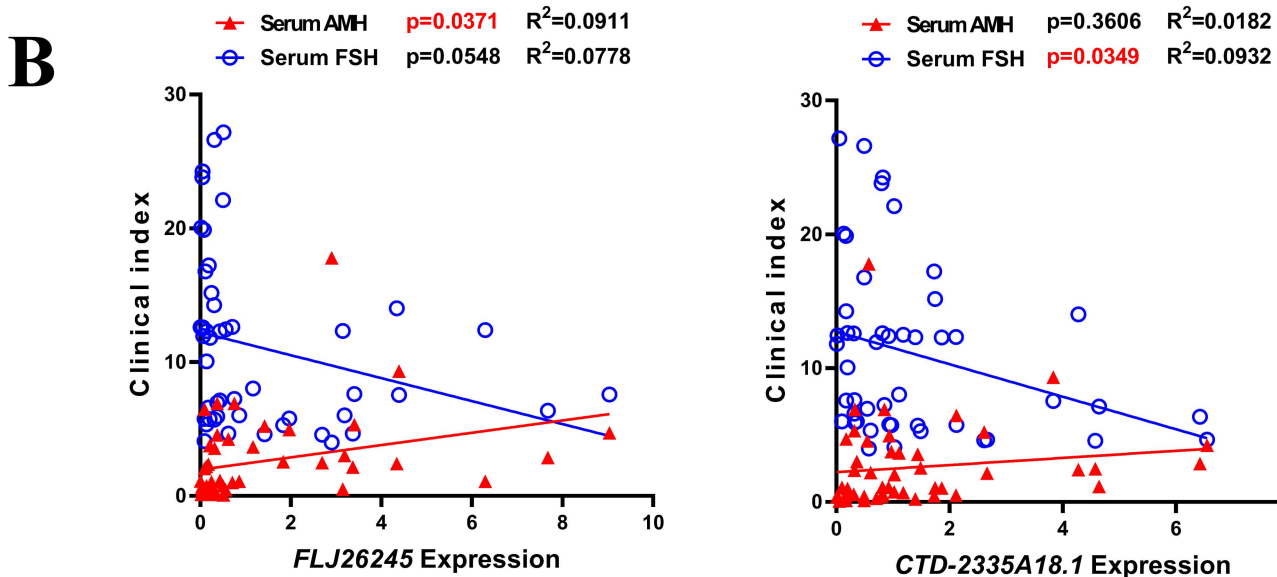

**Figure S1. (A)** The expression level of differentially expressed lncRNAs was validated by qRT-PCR in GCs from an independent cohort of patients with bPOI ( $n = 24$ ) and controls ( $n = 24$ ). Ct values were normalized to GAPDH. Data are presented as the median  $\pm$  interquartile range. NS = No significance. Two-tailed Mann–Whitney U-test. **(B)** The correlation between the expression levels of lncRNAs in GCs and the serum concentration of AMH and FSH was analyzed by Pearson Correlation Analysis.

**A**

You can get the results by visit [http://cpc2.cbi.pku.edu.cn/run\\_cpc2\\_result.php?userid=200322290431326](http://cpc2.cbi.pku.edu.cn/run_cpc2_result.php?userid=200322290431326) later. Also you can remember your task id **200322290431326** and retrieve the results at <http://cpc2.cbi.pku.edu.cn/batch.php>.

[Download the result](#) Sort by

| ID    | Label     | Coding probability | Peptide length(aa) | Fickett score | Isoelectric point | ORF integrity | Details              |
|-------|-----------|--------------------|--------------------|---------------|-------------------|---------------|----------------------|
| GCAT1 | noncoding | 0.0524034          | 61                 | 0.33138       | 4.87017822266     | complete      | <a href="#">View</a> |

« 1 »

**B**


[Calculator](#) [User Guide](#) [Feedback](#) [Source Code](#)

Result for species name : hg19 with job ID :1584807841

| Data ID | Sequence Name | RNA Size | ORF Size | Fickett Score | Hexamer Score  | Coding Probability | Coding Label |
|---------|---------------|----------|----------|---------------|----------------|--------------------|--------------|
| 0       | GCAT1         | 459      | 183      | 0.8904        | 0.114213447958 | 0.06949037463803   | no           |

This job has been stored with the job ID [Download Table in tab delimited file \(.txt\)](#)

For suggestions, comments or queries about this website, please leave your feedback through [Feedback](#). Copyright © 2012. All rights reserved.

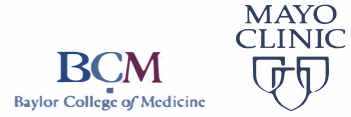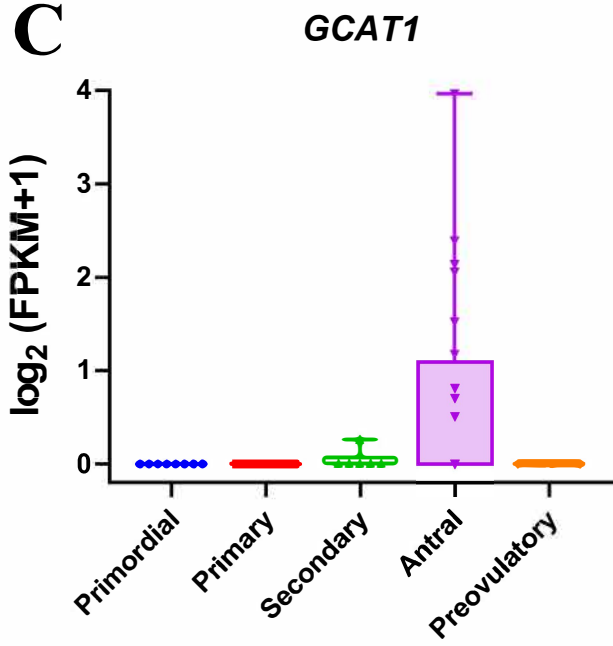

**Figure S2. (A/B)** Coding probability of *GCAT1* was assessed by Coding Potential Calculator (CPC2)(A) and Coding-Potential Assessment Tool (CPAT)(B). **(C)** The expression of *GCAT1* in human granulosa cells during folliculogenesis.

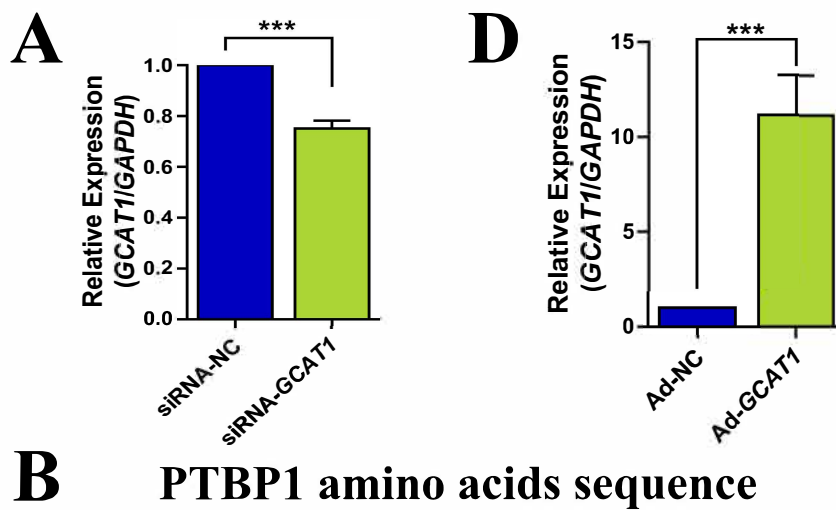

MDGIVPDIAGVTKRGSDELSTCVTNGPFISSNSASAANGNDSKKFKGDSRSAGVPSRVIHIRKLPIDVTE  
 GEVISLGLPFGKVTNLLMLKGKNQAFIEMNTEEAANTMVNYYTSVITPVLRGQPIYIQFSNHKELKTDSSP  
 NQARAQAALQAVNSVQSGNLALAASAAVDAGMAMAGQSPVLRRIIVENLFYPTLTDVLHQIFSKFGTVL  
 KIITFTKNNQFQALLQYADPVSAQHAKLSLDGQNIYNACCTLRIDFSKLTSLNVKYNNDKSRDYTRPDLPS  
 GDSQPSLDQTMAAAFGAPGIISAPYAGAGFPPTFAIPQAAGLSVNPVHGALAPLAIPSAAAAAAAAAAGRIAI  
 PGLAGAGNSVLLVSNLNPERSVTPQSLFILFGVYGDVQVRVKILFNKKENALVQMADGNQAQLAMSHLNGH  
 KLHGKPIRITLSKHQNVQLPREGQEDQGLTKDYGNSPLHRFKKPGSKNFQNIFFPSATLHLSNIPPSVSEED  
 LKVLFFSSNGGVVKGKFFQKDRKMALIQMGSVVEEAVQALIDLHNHDLGENHHLRVSFASKSTI

METEQPEETFPNTETNGEFGKRPAEDMEEEQAFKRSRNTDEMVELRILLQSKNAGAVIGKGGKNIKALRT  
 DYNASVSPDSSGPERILSISADIETIGEILKKIIPGLEGLQLPSPTATSQLPLESDAVECLNYQHYKGSDFD  
 CELRLLIHQSLAGGIIGVKGAKIKELRENTQTTIKLFQECCPHSTDRVVLIGGKPDRVVECIIHLDLISESPIK  
 GRAQPYDPNFYDETYDYGFTMMFDDRRGRPVGFPMRGRGGFDRMPPGRGGRMPPSRRDYDDMSPR  
 RGPPIPPPPGRGGRGGSARNLPLPPPPPPRGDLMAYDRRGRPGDRYDGMVGFSADETWDSAIDTWSPSE  
 WQMAYEPQGGSGYDYSYAGGRGSYGDLLGGPIITQVTIPKDLAGSIIGKGGQRIKQIRHESGASIKIDEPLE  
 GSEDRIITITGTQDQIQNAQYLLQNSVKQYADVEGF

**Figure S3.** (A) The efficiency of *GCAT1* knockdown via siRNA in KGN cells was detected by qRT-PCR. Values of qRT-PCR were obtained from triplicates and expressed as the mean  $\pm$ SD (n = 3). Two-tailed Student's t-test. \*\*\*P < 0.001. (B) The amino acid sequence of PTBP1 protein. Five unique peptides identified by MS from *GCAT1*-binding protein were highlighted in red font and the RNA-binding domains were highlighted by gray background. (C) The amino acid sequence of hnRNPk protein. Seven unique peptides identified by MS from *GCAT1*-binding protein were highlighted in red font and the RNA-binding domains were highlighted by gray background. (D) The efficiency of *GCAT1* over-expression via adenovirus in KGN cells was detected by qRT-PCR. Values of qRT-PCR were obtained from triplicates and expressed as the mean  $\pm$ SD (n = 3). Two-tailed Student's t-test. \*\*\*P < 0.001.

**Table S1 List of primers used in this study**

| <b>Gene<br/>(homo sapiens)</b> | <b>Forward (5'-3')</b>  | <b>Reverse (5'-3')</b>  |
|--------------------------------|-------------------------|-------------------------|
| <i>GCAT1</i>                   | AGGTCTCCTGCCTCCTCCAA    | TCCTCTTCCTCCACCTCTGC    |
| <i>GAPDH</i>                   | GGGAAACTGTGGCGTGAT      | GAGTGGGTGTTCGCTGTTGA    |
| <i>LMNB1</i>                   | GAAAAAGACAACCTCTCGTCGCA | GTAAGCACTGATTTCCATGTCCA |
| <i>CDKN1B</i>                  | GTCAAACGTGCGAGTGTCTA    | CATGTCTCTGCAGTGCTTCT    |
| <i>PTBP1</i>                   | ATTGTCCCAGATATAGCCGTTG  | GCTGTCATTTCCGTTTGCTG    |

**Table S2 List of siRNA used in this study**

| <b>siRNAs</b>        | <b>Sense(5'-3')</b>   |
|----------------------|-----------------------|
| siRNA- <i>GCAT1</i>  | GAUGGCAGAGCAGAUGCAATT |
| siRNA- <i>CDKN1B</i> | GAGCAATGCGCAGGAATAAGG |
| siRNA- <i>PTBP1</i>  | CCAGCCCATCTACATCCAGTT |

**Table S3 List of antibodies used in this study**

| <b>Antibody</b> | <b>Supplier</b>           | <b>Catalog#</b> | <b>Application</b> |
|-----------------|---------------------------|-----------------|--------------------|
| Anti-PTBP1      | Abcam                     | ab133734        | WB                 |
| Anti-PTBP1      | Cell Signaling Technology | 57246S          | RIP                |
| Anti-hnRNPk     | Abcam                     | ab39975         | RIP                |
| Anti-p27 Kip1   | Cell Signaling Technology | 3686S           | WB                 |
| Tubulin         | Proteintech               | 66031-1-Ig      | WB                 |
| Actin           | Proteintech               | 66009-1-Ig      | WB                 |
